# Supplementary material for: Five supramolecular compounds of water-soluble sulfonylcalix[4]arenetetrasulfonate showing two calixarene conformations
Source: Royal Society of Chemistry journal article supplement (doi:10.1039/b812582a), 2008-12-05
Supplement: b812582a.pdf [file b812582a.pdf]

## Electronic Supplementary Information

# Five Supramolecular Compounds of Water-soluble Sulfonylcalix[4]arenetetrasulfonate Showing Two Calixarene Conformations

Yan-Feng Bi, Wu-Ping Liao,\* Xiao-Fei Wang, Yan-Ling Li, Zhong-Min Su, Ya-Bing Liu,

Hong-Jie Zhang,\* De-Qian Li

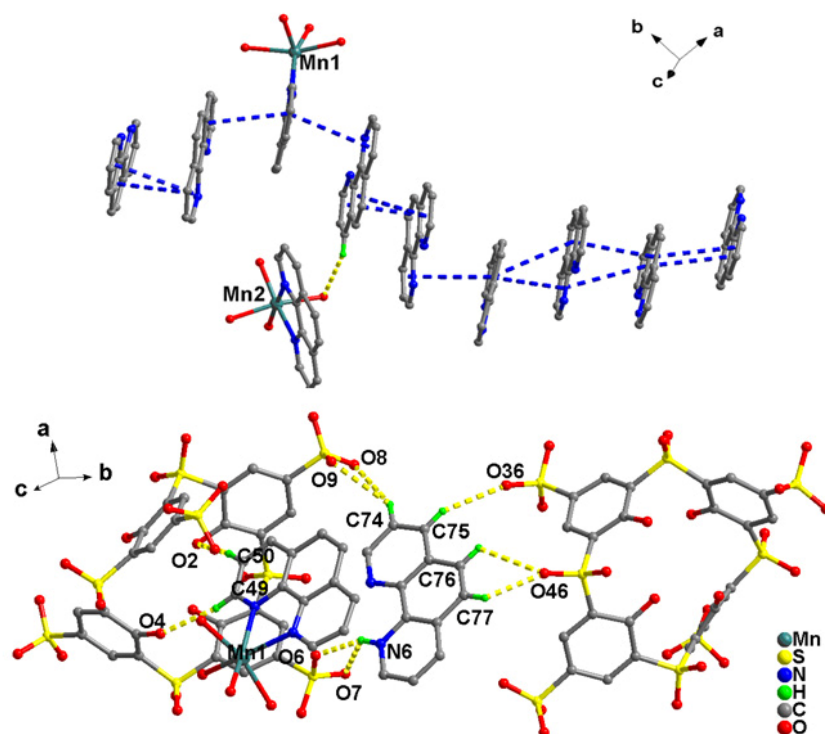

Fig. S1 The supramolecular interactions in 2.

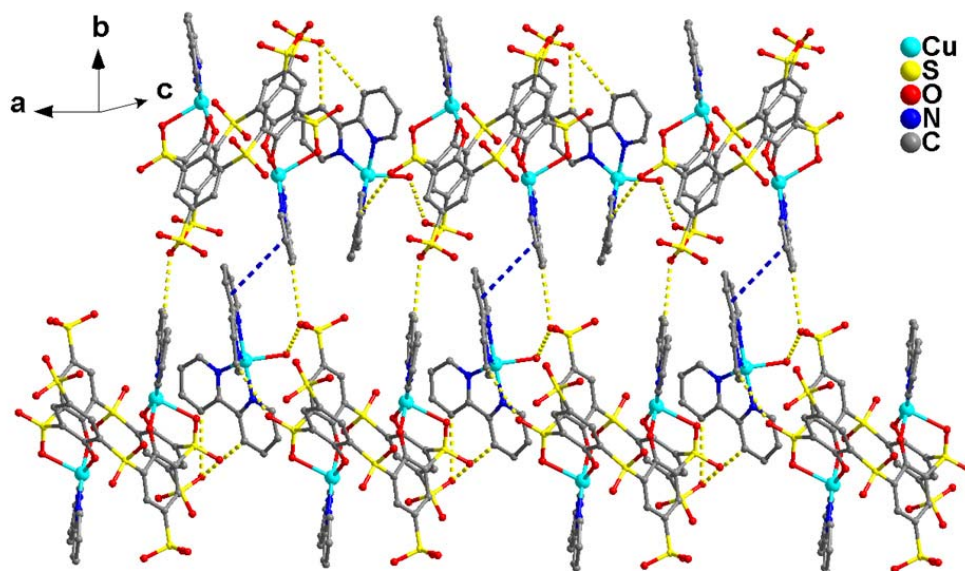

a

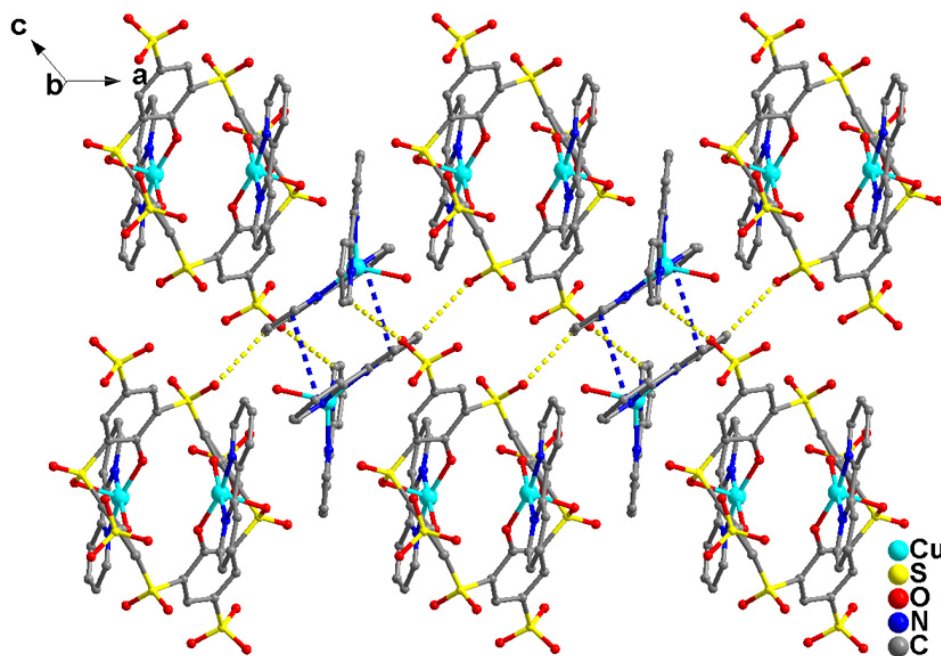

b

Fig. S2 Supramolecular network of 4 showing H-bondings and  $\pi$ - $\pi$  interactions.

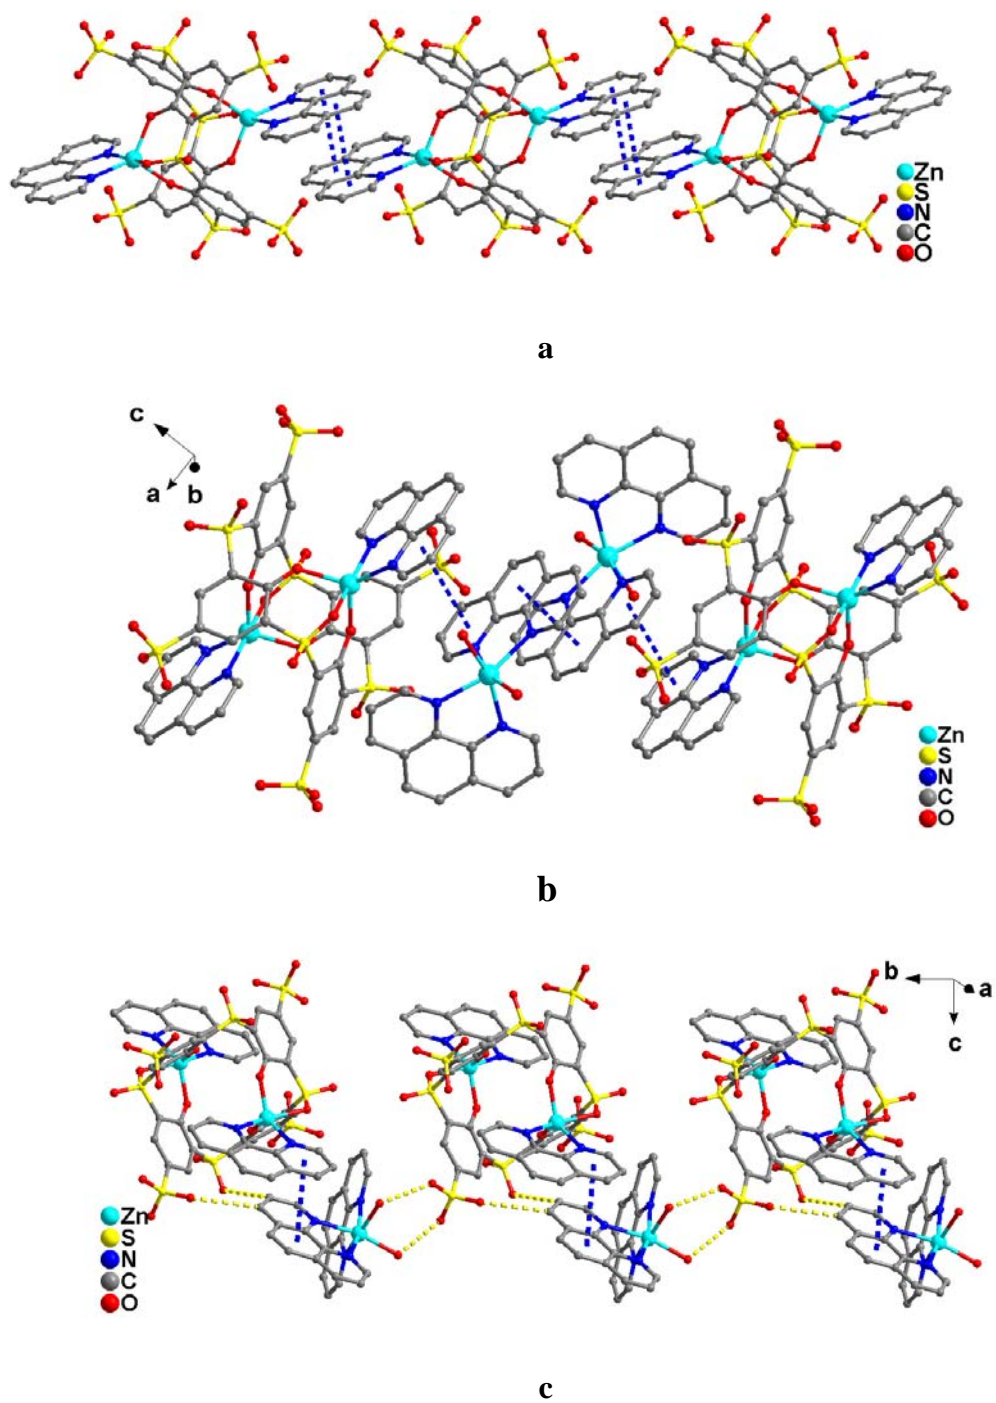

**Fig. S3** Supramolecular interactions in **5**.

**Table S1.** Hydrogen–Bonding Geometry (Å, °) for Compounds **1-5**

| D–H...A               | D–H  | H...A | D...A     | <D–H...A | Symmetry code |
|-----------------------|------|-------|-----------|----------|---------------|
| <b>1</b>              |      |       |           |          |               |
| C(49)–H(49A)...O(15)  | 0.95 | 2.38  | 3.151(9)  | 138      | 1-x,1-y,1-z   |
| C(51)–H(51A)...O(2)   | 0.95 | 2.49  | 3.148(12) | 127      | 1-x,1-y,1-z   |
| C(51)–H(51A)...O(20)  | 0.95 | 2.39  | 3.294(12) | 159      | 1-x,1-y,1-z   |
| C(52)–H(52A)...O(19)  | 0.95 | 2.38  | 3.151(12) | 138      | x, y, z       |
| C(54)–H(54A)...O(7)   | 0.95 | 2.58  | 3.487(10) | 160      | x, y, z       |
| C(56)–H(56A)...O(8)   | 0.95 | 2.39  | 3.220(12) | 146      | -x,1-y,1-z    |
| <b>2</b>              |      |       |           |          |               |
| N(6)–H(6A)...O(6)     | 0.88 | 1.89  | 2.690(7)  | 150      | x, y, z       |
| N(9)–H(9A)...O(42)    | 0.88 | 1.89  | 2.678(7)  | 148      | x,-1+y,z      |
| N(16)–H(16G)...O(35)  | 0.88 | 1.92  | 2.708(7)  | 148      | 1-x,1-y,1-z   |
| N(20)–H(20B)...O(23)  | 0.88 | 1.99  | 2.776(7)  | 148      | x,1+y,z       |
| C(101)–H(10C)...O(48) | 0.95 | 2.60  | 3.122(11) | 115      | 2-x,1-y,1-z   |
| C(115)–H(11F)...O(22) | 0.95 | 2.30  | 3.248(9)  | 174      | -1+x,y,-1+z   |
| C(121)–H(12A)...O(31) | 0.95 | 2.59  | 3.411(14) | 145      | 1-x,1-y,1-z   |
| C(127)–H(12H)...O(24) | 0.95 | 2.37  | 3.290(12) | 163      | -1+x,y,-1+z   |
| C(134)–H(13B)...O(34) | 0.95 | 2.49  | 3.274(11) | 140      | 1-x,1-y,1-z   |
| C(135)–H(13C)...O(7)  | 0.95 | 2.57  | 3.471(11) | 159      | 1-x,1-y,1-z   |
| C(137)–H(13E)...O(19) | 0.95 | 2.48  | 3.185(9)  | 131      | 1-x,1-y,1-z   |
| C(138)–H(13F)...O(20) | 0.95 | 2.52  | 3.411(9)  | 156      | -1+x,y,-1+z   |
| C(49)–H(49A)...O(4)   | 0.95 | 2.34  | 3.274(8)  | 168      | x, y, z       |
| C(54)–H(54A)...O(43)  | 0.95 | 2.51  | 3.425(7)  | 162      | -x,1-y,1-z    |
| C(55)–H(55A)...O(25)  | 0.95 | 2.48  | 3.281(9)  | 142      | -x,1-y,1-z    |
| C(65)–H(65A)...O(33)  | 0.95 | 2.50  | 3.403(9)  | 159      | -x,1-y,1-z    |
| C(67)–H(67A)...O(43)  | 0.95 | 2.59  | 3.403(10) | 143      | -x,1-y,1-z    |
| C(75)–H(75A)...O(56)  | 0.95 | 2.57  | 3.289(9)  | 133      | x,1+y,z       |
| C(77)–H(77A)...O(46)  | 0.95 | 2.39  | 3.125(9)  | 134      | x, y, z       |
| C(78)–H(78A)...O(26)  | 0.95 | 2.43  | 3.225(9)  | 141      | 1-x,1-y,1-z   |
| C(80)–H(80A)...O(38)  | 0.95 | 2.41  | 3.158(9)  | 136      | 1-x,1-y,1-z   |
| C(85)–H(85A)...O(48)  | 0.95 | 2.32  | 3.028(11) | 131      | 2-x,1-y,1-z   |
| C(92)–H(92A)...O(11)  | 0.95 | 2.60  | 3.329(10) | 134      | x, y, z       |
| C(99)–H(99A)...O(39)  | 0.95 | 2.27  | 3.193(10) | 165      | 2-x,1-y,1-z   |
| <b>3</b>              |      |       |           |          |               |

|                      |      |      |          |     |                  |
|----------------------|------|------|----------|-----|------------------|
| C(39)–H(39)...O(4)   | 0.93 | 2.51 | 3.426(8) | 169 | 1/2-x,1/2-y,1-z  |
| C(40)–H(40)..O(3)    | 0.93 | 2.47 | 3.393(8) | 171 | 1/2-x,1/2-y,1-z  |
| C(44)–H(44)...O(5)   | 0.93 | 2.58 | 3.160(9) | 121 | x,1+y,z          |
| <b>4</b>             |      |      |          |     |                  |
| O(13)–H(13A)...O(3)  | 0.80 | 1.87 | 2.658(4) | 172 | 2-x,-y,2-z       |
| O(13)–H(13B)... O(8) | 0.88 | 1.82 | 2.681(4) | 167 | 1-x,-y,1-z       |
| C(29)–H(29)...O(8)   | 0.95 | 2.41 | 3.361(5) | 176 | x, y, z          |
| C(34)–H(34)...O(10)  | 0.95 | 2.54 | 3.147(5) | 122 | 2-x,-y,2-z       |
| C(20)–H(20)...O(3)   | 0.95 | 2.28 | 3.155(5) | 152 | 2-x,-1/2+y,5/2-z |
| C(16)–H(16)...O(6)   | 0.95 | 2.52 | 3.155(5) | 124 | 1-x,-1/2+y,3/2-z |
| <b>5</b>             |      |      |          |     |                  |
| O(13)–H(13B)...O(9)  | 0.84 | 1.89 | 2.718(4) | 169 | x, y, z          |
| O(13)–H(13A)...O(10) | 0.89 | 1.84 | 2.712(6) | 169 | -1+x,y,z         |
| O(14)–H(14B)...O(8)  | 0.84 | 1.91 | 2.731(4) | 167 | x, y, z          |
| C(26)–H(26A)...O(6)  | 0.95 | 2.59 | 3.377(7) | 141 | x,-1+y,z         |
| C(27)–H(27A)...O(7)  | 0.95 | 2.55 | 3.490(6) | 171 | x,-1+y,z         |
| C(40)–H(40A)...O(8)  | 0.95 | 2.27 | 3.216(7) | 175 | 1-x,1-y,-z       |
| C(41)–H(41A)...O(12) | 0.95 | 2.57 | 3.383(7) | 144 | 1-x,1-y,1-z      |
| C(42)–H(42A)...O(12) | 0.95 | 2.53 | 3.353(7) | 145 | 1-x,1-y,1-z      |
| C(43)–H(43A)...O(4)  | 0.95 | 2.43 | 3.294(6) | 152 | x, y, z          |

**Table S2.** Selected Bond Distances (Å) for Compounds **1-5**

| <b>1</b>    |          |             |          |
|-------------|----------|-------------|----------|
| Na(1)–O(5)  | 2.244(5) | Na(1)–O(25) | 2.355(5) |
| Na(1)–O(23) | 2.316(5) | Na(1)–O(26) | 2.421(7) |
| Na(1)–O(15) | 2.319(5) | Na(1)–N(1)  | 2.857(7) |
| <b>2</b>    |          |             |          |
| Mn(1)–O(50) | 2.145(5) | Mn(2)–O(53) | 2.143(5) |
| Mn(1)–O(49) | 2.188(5) | Mn(2)–O(54) | 2.178(5) |
| Mn(1)–O(52) | 2.211(5) | Mn(2)–O(56) | 2.194(5) |
| Mn(1)–O(51) | 2.247(5) | Mn(2)–O(55) | 2.215(5) |
| Mn(1)–N(1)  | 2.263(5) | Mn(2)–N(4)  | 2.243(5) |
| Mn(1)–N(2)  | 2.297(5) | Mn(2)–N(3)  | 2.276(5) |
| <b>3</b>    |          |             |          |
| Cu(1)–O(2)  | 1.920(3) | Cu(2)–N(5)  | 1.978(4) |
| Cu(1)–O(1)  | 1.923(3) | Cu(2)–N(4)  | 1.980(4) |
| Cu(1)–N(2)  | 2.008(4) | Cu(2)–N(3)  | 2.016(5) |
| Cu(1)–N(1)  | 2.017(4) | Cu(2)–N(6)  | 2.036(4) |
| Cu(1)–O(9)  | 2.359(4) | Cu(2)–O(6)  | 2.182(4) |
| <b>4</b>    |          |             |          |
| Cu(1)–O(1)  | 1.924(2) | Cu(2)–N(3)  | 1.981(3) |
| Cu(1)–O(2)  | 1.940(2) | Cu(2)–N(6)  | 1.994(3) |
| Cu(1)–N(1)  | 1.991(3) | Cu(2)–N(4)  | 2.042(3) |
| Cu(1)–N(2)  | 1.996(3) | Cu(2)–N(5)  | 2.075(3) |
| Cu(1)–O(9)  | 2.279(2) | Cu(2)–O(13) | 2.089(2) |
| <b>5</b>    |          |             |          |
| Zn(1)–O(2)  | 1.980(3) | Zn(2)–O(14) | 2.082(3) |
| Zn(1)–O(1)  | 1.986(3) | Zn(2)–O(13) | 2.128(3) |
| Zn(1)–N(2)  | 2.074(4) | Zn(2)–N(6)  | 2.158(4) |
| Zn(1)–N(1)  | 2.099(4) | Zn(2)–N(4)  | 2.161(4) |
| Zn(1)–O(3)  | 2.152(3) | Zn(2)–N(5)  | 2.183(4) |
| Zn(2)–N(3)  | 2.217(4) |             |          |
